# Supplementary material
Source: MDPI journal article supplement (https://www.mdpi.com/1999-4907/15/5/834)
Supplement: s1 [file s1 › forests-2925655-supplementary.pdf]

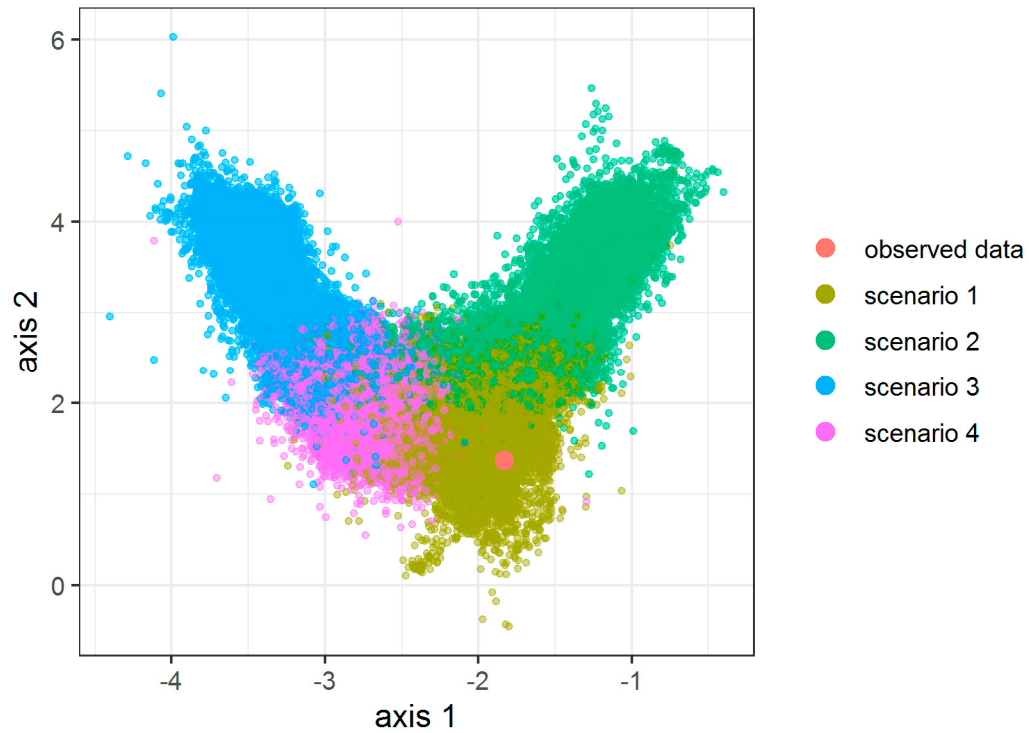

**Figure S1.** Projection of the datasets from the training set on the first two linear discriminant analysis (LDA) axes for the four alternate scenarios by ABC random forest (ABC-RF) approach.

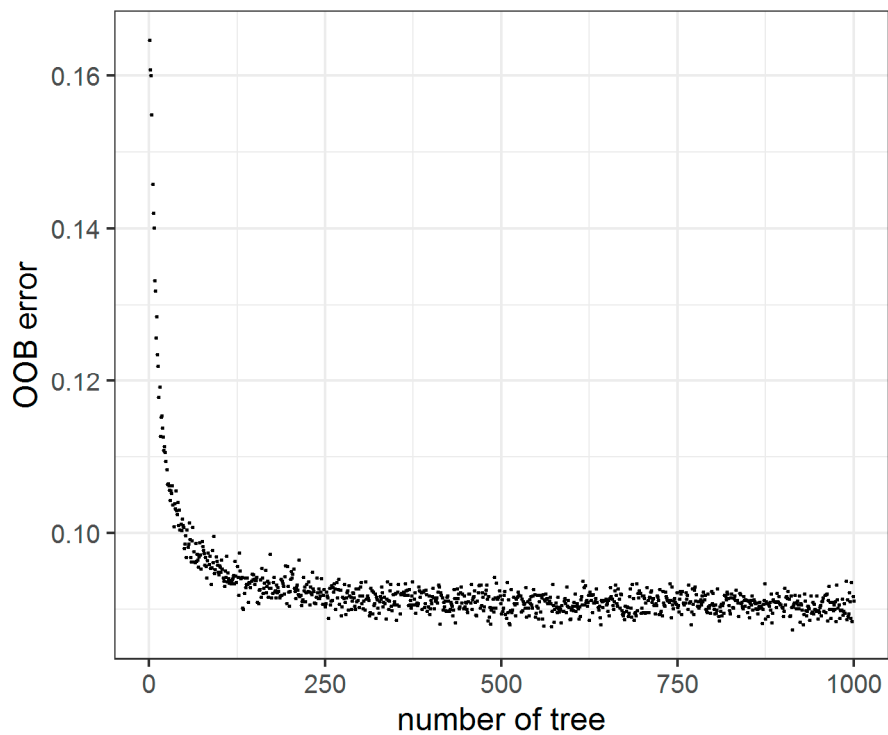

**Figure S2.** Evolution of prediction power relatively to the number of trees in the forest by ABC random forest (ABC-RF) approach.

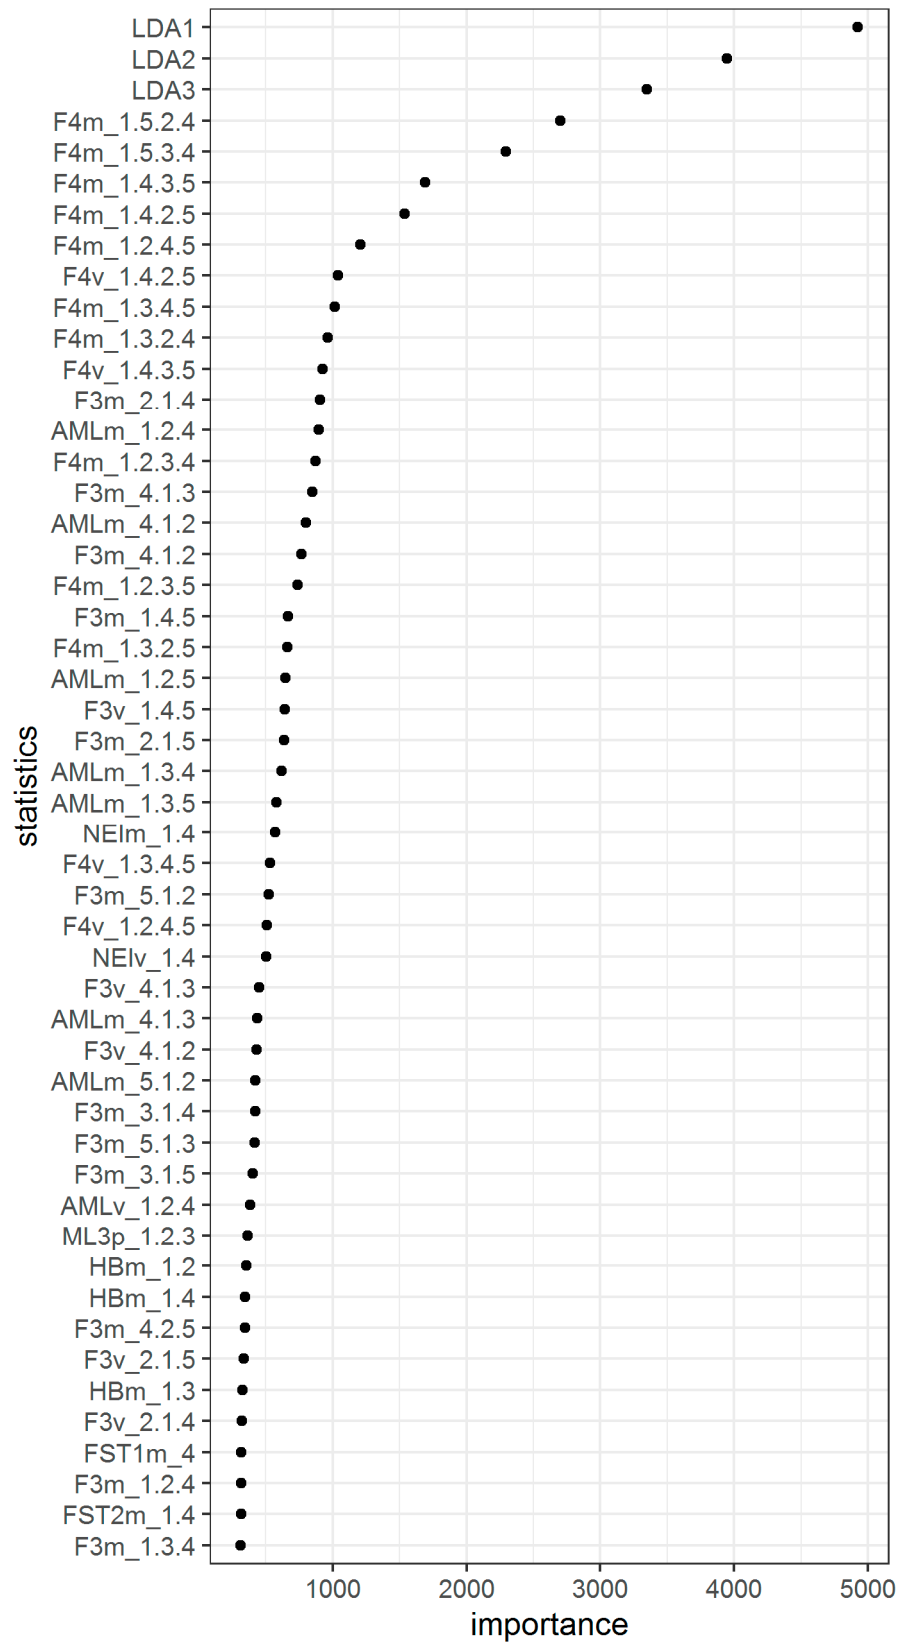

**Figure S3.** Contributions of the 50 most informative statistics to the Random Forest when choosing among the four alternate scenarios.
